# Supplementary material
Source: Springer Nature journal article supplement (https://www.springermedizin.de/resource/supplementary/13023_2013_628_MOESM9_ESM.pdf/9642548)
Supplement: MOESM9 [file 9642548]

# TASKS OF THE PARTIES

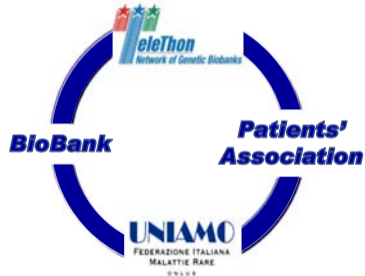

Providing services: collecting, processing, storing and distributing samples according to TNGB policies and SOPs

Publishing the sample collection on TNGB on-line catalogue

Keeping the representative of the Association informed on sample distribution and potential results

Identifying the representative as a guarantor of the agreement

Keeping associated families and referring clinicians informed on TNGB activities and policies

Recruiting patients and relatives, and shipping biospecimens to the biobank
